# Supplementary material for: Identification of a Campylobacter jejuni-secreted protein required for maximal invasion of host cells
Source: PubMed Central journal article supplement (PMC2764114; doi:10.1111/j.1365-2958.2009.06797.x), 2009-07-27
Supplement: mmi0073-0650-SD1.pdf [file mmi0073-0650-SD1.pdf]

**Table S1. *C. jejuni* genes screened for secretion as *yplA* fusions**

| <b>Gene</b> | <b>Locus</b> | <b>Product (Gundogdu <i>et al.</i>, 2007)</b>               |
|-------------|--------------|-------------------------------------------------------------|
| <i>rrc</i>  | Cj0012c      | non-haem iron protein                                       |
| Cj0015c     | Cj0015c      | hypothetical protein                                        |
| <i>dba</i>  | Cj0018c      | disulphide bond formation protein                           |
| Cj0021c     | Cj0021c      | putative fumarylacetoacetate (FAA) hydrolase family protein |
| <i>thyX</i> | Cj0026c      | thymidylate synthase                                        |
| Cj0030      | Cj0030       | hypothetical protein                                        |
| Cj0036      | Cj0036       | hypothetical protein                                        |
| Cj0038c     | Cj0038c      | putative poly(A) polymerase family protein                  |
| Cj0040      | Cj0040       | hypothetical protein                                        |
| <i>fliK</i> | Cj0041       | putative flagellar hook-length control protein              |
| Cj0044c     | Cj0044c      | hypothetical protein                                        |
| Cj0045c     | Cj0045c      | putative iron-binding protein                               |
| Cj0054c     | Cj0054c      | putative lysine decarboxylase family protein                |
| Cj0062c     | Cj0062c      | putative integral membrane protein                          |
| Cj0067      | Cj0067       | putative amidohydrolase family protein                      |
| Cj0069      | Cj0069       | hypothetical protein                                        |
| Cj0073c     | Cj0073c      | hypothetical protein                                        |
| Cj0074c     | Cj0074c      | putative iron-sulfur protein                                |
| Cj0075c     | Cj0075c      | putative oxidoreductase iron-sulfur subunit                 |
| Cj0085c     | Cj0085c      | putative amino acid recemase                                |
| Cj0118      | Cj0118       | hypothetical protein                                        |
| Cj0120      | Cj0120       | hypothetical protein                                        |
| Cj0121      | Cj0121       | hypothetical protein                                        |
| Cj0122      | Cj0122       | hypothetical protein                                        |
| Cj0125c     | Cj0125c      | hypothetical protein                                        |
| Cj0126c     | Cj0126c      | hypothetical protein                                        |
| Cj0128c     | Cj0128c      | putative inositol monophosphatase family protein            |
| Cj0133      | Cj0133       | putative glycoprotease family protein                       |
| Cj0135      | Cj0135       | hypothetical protein                                        |
| Cj0138      | Cj0138       | hypothetical protein                                        |
| Cj0140      | Cj0140       | hypothetical protein                                        |
| Cj0148c     | Cj0148c      | hypothetical protein                                        |
| Cj0152c     | Cj0152c      | putative membrane protein                                   |
| Cj0156c     | Cj0156c      | hypothetical protein                                        |
| Cj0157c     | Cj0157c      | putative integral membrane protein                          |
| Cj0159c     | Cj0159c      | putative 6-pyruvoyl tetrahydropterin synthase               |
| Cj0160c     | Cj0160c      | putative radical SAM domain protein                         |
| Cj0162c     | Cj0162c      | putative periplasmic protein                                |
| Cj0163c     | Cj0163c      | hypothetical protein                                        |
| Cj0172c     | Cj0172c      | putative saccharopine dehydrogenase                         |
| Cj0184c     | Cj0184c      | possible serine\threonine protein phosphatase               |
| Cj0188c     | Cj0188c      | putative kinase                                             |
| Cj0189c     | Cj0189c      | hypothetical protein                                        |
| Cj0229      | Cj0229       | putative acetyltransferase                                  |
| Cj0230c     | Cj0230c      | putative transferase protein                                |
| Cj0232c     | Cj0232c      | putative integral membrane protein                          |
| Cj0239c     | Cj0239c      | nifU protein homolog                                        |
| Cj0241c     | Cj0241c      | putative iron-binding protein                               |
| Cj0249      | Cj0249       | hypothetical protein                                        |
| Cj0251c     | Cj0251c      | highly acidic protein                                       |
| Cj0253      | Cj0253       | hypothetical protein                                        |
| Cj0254      | Cj0254       | hypothetical protein                                        |

|             |         |                                                            |
|-------------|---------|------------------------------------------------------------|
| Cj0258      | Cj0258  | putative bacterial regulatory protein, ArsR family         |
| Cj0270      | Cj0270  | putative tautomerase family protein                        |
| Cj0272      | Cj0272  | hypothetical protein                                       |
| Cj0286c     | Cj0286c | hypothetical protein                                       |
| Cj0323      | Cj0323  | hypothetical protein                                       |
| Cj0327      | Cj0327  | putative endoribonuclease L-PSP family protein             |
| Cj0331c     | Cj0331c | hypothetical protein                                       |
| Cj0340      | Cj0340  | putative nucleoside hydrolase                              |
| Cj0344      | Cj0344  | hypothetical protein                                       |
| Cj0353c     | Cj0353c | phosphatase                                                |
| <i>glmM</i> | Cj0360  | phosphoglucosamine mutase                                  |
| <i>hemN</i> | Cj0363c | putative oxygen-independent coproporphyrinogen III oxidase |
| Cj0364      | Cj0364  | hypothetical protein                                       |
| Cj0372      | Cj0372  | putative glutathionylspermidine synthase                   |
| Cj0373      | Cj0373  | putative D-2-hydroxyacid dehydrogenase                     |
| Cj0374      | Cj0374  | hypothetical protein                                       |
| Cj0377      | Cj0377  | probable AAA family ATPase                                 |
| Cj0380c     | Cj0380c | hypothetical protein                                       |
| Cj0386      | Cj0386  | putative GTP-binding protein                               |
| Cj0391c     | Cj0391c | hypothetical protein                                       |
| <i>mgo</i>  | Cj0393c | putative malate:quinone oxidoreductase                     |
| Cj0394c     | Cj0394c | putative transcriptional activator                         |
| Cj0395c     | Cj0395c | hypothetical protein                                       |
| Cj0397c     | Cj0397c | hypothetical protein                                       |
| Cj0403      | Cj0403  | hypothetical protein                                       |
| Cj0404      | Cj0404  | putative transmembrane protein                             |
| Cj0411      | Cj0411  | putative ATP/GTP binding protein                           |
| Cj0412      | Cj0412  | putative ATP/GTP binding protein                           |
| Cj0415      | Cj0415  | putative GMC oxidoreductase subunit                        |
| Cj0416      | Cj0416  | hypothetical protein                                       |
| Cj0421c     | Cj0421c | putative integral membrane protein                         |
| Cj0427      | Cj0427  | hypothetical protein                                       |
| Cj0429c     | Cj0429c | hypothetical protein                                       |
| Cj0436      | Cj0436  | putative pyridoxamine 5'-phosphate oxidase                 |
| Cj0447      | Cj0447  | putative NUDIX hydrolase family protein                    |
| Cj0449c     | Cj0449c | hypothetical protein                                       |
| Cj0456c     | Cj0456c | hypothetical protein                                       |
| Cj0457c     | Cj0457c | putative lipoprotein                                       |
| Cj0462      | Cj0462  | putative radical SAM domain protein                        |
| Cj0463      | Cj0463  | zinc protease-like protein                                 |
| <i>ctb</i>  | Cj0465c | group III truncated haemoglobin                            |
| <i>dapA</i> | Cj0481  | putative dihydrodipicolinate synthase                      |
| Cj0485      | Cj0485  | putative oxidoreductase                                    |
| Cj0487      | Cj0487  | putative amidohydrolase                                    |
| Cj0488      | Cj0488  | hypothetical protein                                       |
| Cj0496      | Cj0496  | hypothetical protein                                       |
| Cj0499      | Cj0499  | putative histidine triad (HIT) family protein              |
| Cj0500      | Cj0500  | putative rhodanese-like domain protein                     |
| Cj0504c     | Cj0504c | putative oxidoreductase                                    |
| Cj0505c     | Cj0505c | putative aminotransferase (degT family)                    |
| Cj0510c     | Cj0510c | hypothetical protein                                       |
| Cj0519      | Cj0519  | putative rhodanese-like domain protein                     |
| Cj0539      | Cj0539  | hypothetical protein                                       |
| <i>ubiD</i> | Cj0546  | putative 3-octaprenyl-4-hydroxybenzoate carboxy-lyase      |
| Cj0550      | Cj0550  | hypothetical protein                                       |
| Cj0556      | Cj0556  | putative amidohydrolase family protein                     |

|             |         |                                                                  |
|-------------|---------|------------------------------------------------------------------|
| Cj0559      | Cj0559  | putative pyridine nucleotide-disulphide oxidoreductase           |
| Cj0563      | Cj0563  | hypothetical protein                                             |
| Cj0571      | Cj0571  | putative transcriptional regulator                               |
| Cj0573      | Cj0573  | putative GatB/Yqey family protein                                |
| <i>nudH</i> | Cj0581  | putative NUDIX hydrolase family protein                          |
| Cj0583      | Cj0583  | hypothetical protein                                             |
| Cj0600      | Cj0600  | hypothetical protein                                             |
| Cj0602c     | Cj0602c | MOSC-domain containing protein                                   |
| Cj0604      | Cj0604  | putative polyphosphate kinase                                    |
| Cj0611c     | Cj0611c | putative acyltransferase family protein                          |
| Cj0620      | Cj0620  | hypothetical protein                                             |
| Cj0621      | Cj0621  | hypothetical protein                                             |
| <i>holA</i> | Cj0630c | putative DNA polymerase III, delta subunit                       |
| Cj0635      | Cj0635  | putative holliday junction resolvase                             |
| Cj0636      | Cj0636  | NOL1NOP2\sun family protein                                      |
| Cj0641      | Cj0641  | putative inorganic polyphosphate/ATP-NAD kinase                  |
| Cj0644      | Cj0644  | putative TatD-related deoxyribonuclease protein                  |
| Cj0647      | Cj0647  | putative HAD-superfamily hydrolase                               |
| Cj0650      | Cj0650  | putative ATP/GTP binding protein                                 |
| Cj0667      | Cj0667  | putative S4 domain protein                                       |
| Cj0668      | Cj0668  | putative ATP/GTP-binding protein                                 |
| Cj0681      | Cj0681  | hypothetical protein                                             |
| Cj0682      | Cj0682  | hypothetical protein                                             |
| Cj0700      | Cj0700  | hypothetical protein                                             |
| Cj0701      | Cj0701  | putative protease                                                |
| Cj0703      | Cj0703  | hypothetical protein                                             |
| Cj0706      | Cj0706  | hypothetical protein                                             |
| Cj0708      | Cj0708  | putative ribosomal pseudouridine synthase                        |
| Cj0711      | Cj0711  | hypothetical protein                                             |
| Cj0716      | Cj0716  | putative phospho-2-dehydro-3-deoxyheptonate aldolase             |
| Cj0717      | Cj0717  | putative ArsC family protein                                     |
| Cj0719c     | Cj0719c | hypothetical protein                                             |
| Cj0724      | Cj0724  | hypothetical protein                                             |
| Cj0729      | Cj0729  | putative type I phosphodiesterase/nucleotide pyrophosphatase     |
| Cj0733      | Cj0733  | putative HAD-superfamily hydrolase                               |
| Cj0760      | Cj0760  | hypothetical protein                                             |
| Cj0761      | Cj0761  | hypothetical protein                                             |
| Cj0786      | Cj0786  | small hydrophobic protein                                        |
| Cj0787      | Cj0787  | hypothetical protein                                             |
| Cj0788      | Cj0788  | hypothetical protein                                             |
| Cj0791c     | Cj0791c | putative aminotransferase                                        |
| Cj0792      | Cj0792  | hypothetical protein                                             |
| Cj0794      | Cj0794  | hypothetical protein                                             |
| Cj0797c     | Cj0797c | hypothetical protein                                             |
| Cj0800c     | Cj0800c | putative ATPase                                                  |
| Cj0805      | Cj0805  | putative zinc protease                                           |
| Cj0808c     | Cj0808c | small hydrophobic protein                                        |
| Cj0809c     | Cj0809c | putative hydrolase                                               |
| Cj0823      | Cj0823  | hypothetical protein                                             |
| Cj0829c     | Cj0829c | putative CoA binding domain containing protein                   |
| Cj0833c     | Cj0833c | oxidoreductase                                                   |
| Cj0837c     | Cj0837c | hypothetical protein                                             |
| Cj0839c     | Cj0839c | hypothetical protein                                             |
| <i>mobB</i> | Cj0841c | putative molybdopterin-guanine dinucleotide biosynthesis protein |
| Cj0844c     | Cj0844c | putative integral membrane protein                               |
| Cj0849c     | Cj0849c | hypothetical protein                                             |

|             |         |                                                           |
|-------------|---------|-----------------------------------------------------------|
| Cj0852c     | Cj0852c | putative integral membrane protein                        |
| Cj0859c     | Cj0859c | hypothetical protein                                      |
| Cj0878      | Cj0878  | hypothetical protein                                      |
| Cj0880c     | Cj0880c | hypothetical protein                                      |
| Cj0881c     | Cj0881c | hypothetical protein                                      |
| Cj0883c     | Cj0883c | putative transcriptional regulator                        |
| Cj0898      | Cj0898  | HIT-family protein                                        |
| Cj0915      | Cj0915  | putative hydrolase                                        |
| Cj0916c     | Cj0916c | hypothetical protein                                      |
| Cj0930      | Cj0930  | putative GTP-binding protein                              |
| Cj0939c     | Cj0939c | hypothetical protein                                      |
| Cj0947c     | Cj0947c | putative carbon-nitrogen hydrolase                        |
| Cj0949c     | Cj0949c | putative peptidyl-arginine deiminase family protein       |
| Cj0954c     | Cj0954c | putative dnaJ-like protein                                |
| Cj0957c     | Cj0957c | hypothetical protein                                      |
| Cj0959c     | Cj0959c | hypothetical protein                                      |
| Cj0962      | Cj0962  | putative acetyltransferase                                |
| Cj0963      | Cj0963  | hypothetical protein                                      |
| Cj0965c     | Cj0965c | putative acyl-CoA thioester hydrolase                     |
| Cj0971      | Cj0971  | hypothetical protein                                      |
| Cj0972      | Cj0972  | hypothetical protein                                      |
| Cj0973      | Cj0973  | hypothetical protein                                      |
| Cj0976      | Cj0976  | putative methyltransferase                                |
| Cj0977      | Cj0977  | hypothetical protein                                      |
| Cj0984      | Cj0984  | hypothetical protein                                      |
| Cj0989      | Cj0989  | putative membrane protein                                 |
| Cj0990c     | Cj0990c | hypothetical protein                                      |
| Cj0993c     | Cj0993c | hypothetical protein                                      |
| Cj1002c     | Cj1002c | putative phosphoglycerate/bisphosphoglycerate mutase      |
| Cj1006c     | Cj1006c | putative MiaB-like tRNA modifying enzyme                  |
| Cj1009c     | Cj1009c | hypothetical protein                                      |
| Cj1011      | Cj1011  | putative CorA-like Mg <sup>2+</sup> transporter protein   |
| Cj1028c     | Cj1028c | possible purine/pyrimidine phosphoribosyltransferase      |
| Cj1034c     | Cj1034c | possible dnaJ-like protein                                |
| <i>ate</i>  | Cj1035c | putative arginyl-tRNA-protein transferase                 |
| Cj1036c     | Cj1036c | hypothetical protein                                      |
| Cj1056c     | Cj1056c | putative carbon-nitrogen hydrolase family protein         |
| Cj1057c     | Cj1057c | putative coiled-coil protein                              |
| Cj1063      | Cj1063  | possible acetyltransferase                                |
| Cj1075      | Cj1075  | hypothetical protein                                      |
| Cj1084c     | Cj1084c | putative ATP/GTP-binding protein                          |
| Cj1086c     | Cj1086c | hypothetical protein                                      |
| Cj1089c     | Cj1089c | hypothetical protein                                      |
| <i>lnt</i>  | Cj1095  | putative apolipoprotein N-acyltransferase                 |
| Cj1100      | Cj1100  | hypothetical protein                                      |
| <i>clpS</i> | Cj1107  | ATP-dependent Clp protease adaptor protein                |
| Cj1112c     | Cj1112c | putative SelR domain containing protein                   |
| Cj1113      | Cj1113  | hypothetical protein                                      |
| Cj1115c     | Cj1115c | putative phosphatidylserine decarboxylase-related protein |
| Cj1144c     | Cj1144c | hypothetical protein                                      |
| <i>gmhB</i> | Cj1152c | D,D-heptose 1,7-bisphosphate phosphatase                  |
| Cj1162c     | Cj1162c | putative heavy-metal-associated domain protein            |
| Cj1164c     | Cj1164c | hypothetical protein                                      |
| Cj1172c     | Cj1172c | hypothetical protein                                      |
| <i>tatA</i> | Cj1176c | Sec-independent protein translocase (TatA/E homolog)      |
| Cj1178c     | Cj1178c | highly acidic protein                                     |

|                  |         |                                                               |
|------------------|---------|---------------------------------------------------------------|
| Cj1199           | Cj1199  | putative iron/ascorbate-dependent oxidoreductase              |
| Cj1203c          | Cj1203c | putative integral membrane protein                            |
| Cj1208           | Cj1208  | putative 5-formyltetrahydrofolate cyclo-ligase family protein |
| Cj1211           | Cj1211  | putative competence family protein                            |
| Cj1216c          | Cj1216c | hypothetical protein                                          |
| Cj1217c          | Cj1217c | hypothetical protein                                          |
| Cj1224           | Cj1224  | putative iron-binding protein                                 |
| Cj1225           | Cj1225  | hypothetical protein                                          |
| Cj1232           | Cj1232  | hypothetical protein                                          |
| Cj1233           | Cj1233  | putative HAD-superfamily hydrolase                            |
| Cj1236           | Cj1236  | hypothetical protein                                          |
| Cj1237c          | Cj1237c | possible phosphatase                                          |
| Cj1242           | Cj1242  | hypothetical protein                                          |
| Cj1245c          | Cj1245c | putative membrane protein                                     |
| Cj1247c          | Cj1247c | hypothetical protein                                          |
| Cj1249           | Cj1249  | hypothetical protein                                          |
| Cj1251           | Cj1251  | hypothetical protein                                          |
| Cj1254           | Cj1254  | hypothetical protein                                          |
| Cj1256c          | Cj1256c | putative membrane protein                                     |
| Cj1268c          | Cj1268c | putative FAD dependent oxidoreductase                         |
| Cj1270c          | Cj1270c | putative 2-nitropropane dioxygenase, oxidoreductase protein   |
| Cj1285c          | Cj1285c | hypothetical protein                                          |
| <i>pseC</i>      | Cj1294  | C4 aminotransferase specific for PseB product                 |
| Cj1295           | Cj1295  | hypothetical protein                                          |
| Cj1300           | Cj1300  | putative SAM domain containing methyltransferase              |
| Cj1305c          | Cj1305c | hypothetical protein Cj1305c (617 family)                     |
| Cj1306c          | Cj1306c | hypothetical protein Cj1306c (617 family)                     |
| Cj1307           | Cj1307  | putative amino acid activating enzyme                         |
| Cj1309c          | Cj1309c | hypothetical protein                                          |
| Cj1310c          | Cj1310c | hypothetical protein Cj1310c (617 family)                     |
| <i>maf3</i>      | Cj1334  | (Motility accessory factor, function unknown)                 |
| <i>maf4</i>      | Cj1335  | hypothetical protein Cj1335 (1318 family)                     |
| <i>pseE/maf5</i> | Cj1337  | hypothetical protein                                          |
| Cj1342c          | Cj1342c | (Motility accessory factor, function unknown)                 |
| Cj1348c          | Cj1348c | putative coiled-coil protein                                  |
| Cj1349c          | Cj1349c | possible fibronectin/fibrinogen-binding protein               |
| Cj1360c          | Cj1360c | putative proteolysis tag for 10Sa_RNA                         |
| Cj1361c          | Cj1361c | hypothetical protein                                          |
| Cj1367c          | Cj1367c | possible nucleotidyltransferase                               |
| Cj1370           | Cj1370  | putative nucleotide phosphoribosyltransferase                 |
| Cj1374c          | Cj1374c | hypothetical protein                                          |
| Cj1377c          | Cj1377c | putative ferredoxin                                           |
| Cj1383c          | Cj1383c | hypothetical protein                                          |
| Cj1384c          | Cj1384c | hypothetical protein                                          |
| Cj1386           | Cj1386  | ankyrin-repeat containing protein                             |
| Cj1397           | Cj1397  | putative ferrous iron transport protein                       |
| <i>nadD</i>      | Cj1404  | putative nicotinate-nucleotide adenyltransferase              |
| Cj1405           | Cj1405  | hypothetical protein                                          |
| Cj1449c          | Cj1449c | hypothetical protein                                          |
| Cj1450           | Cj1450  | putative ATP/GTP-binding protein                              |
| <i>tilS</i>      | Cj1453c | putative tRNA(Ile)-lysine synthase                            |
| <i>truD</i>      | Cj1457c | tRNA pseudouridine synthase D                                 |
| Cj1459           | Cj1459  | hypothetical protein                                          |
| Cj1460           | Cj1460  | hypothetical protein                                          |
| <i>flagJ</i>     | Cj1463  | hypothetical protein                                          |
| <i>flagM</i>     | Cj1464  | hypothetical protein                                          |

|             |         |                                                               |
|-------------|---------|---------------------------------------------------------------|
| <i>flgN</i> | Cj1465  | hypothetical protein                                          |
| Cj1467      | Cj1467  | hypothetical protein                                          |
| Cj1476c     | Cj1476c | pyruvate-flavodoxin oxidoreductase                            |
| Cj1477c     | Cj1477c | putative hydrolase                                            |
| Cj1482c     | Cj1482c | hypothetical protein                                          |
| Cj1493c     | Cj1493c | putative integral membrane protein                            |
| Cj1495c     | Cj1495c | hypothetical protein                                          |
| Cj1496c     | Cj1496c | putative periplasmic protein                                  |
| Cj1497c     | Cj1497c | hypothetical protein                                          |
| Cj1501      | Cj1501  | hypothetical protein                                          |
| Cj1505c     | Cj1505c | putative two-component response regulator (SirA-like protein) |
| Cj1507c     | Cj1507c | putative regulatory protein                                   |
| Cj1514c     | Cj1514c | hypothetical protein                                          |
| Cj1521c     | Cj1521c | putative CRISPR-associated protein                            |
| Cj1522c     | Cj1522c | putative CRISPR-associated protein                            |
| <i>coaE</i> | Cj1530  | putative dephospho-CoA kinase                                 |
| Cj1533c     | Cj1533c | putative helix-turn-helix containing protein                  |
| Cj1534c     | Cj1534c | possible bacterioferritin                                     |
| Cj1541      | Cj1541  | hypothetical protein                                          |
| Cj1542      | Cj1542  | putative allophanate hydrolase subunit 1                      |
| Cj1543      | Cj1543  | putative allophanate hydrolase subunit 2                      |
| Cj1548c     | Cj1548c | putative NADP-dependent alcohol dehydrogenase                 |
| Cj1558      | Cj1558  | putative membrane protein                                     |
| Cj1585c     | Cj1585c | putative oxidoreductase                                       |
| Cj1602      | Cj1602  | hypothetical protein                                          |
| Cj1613c     | Cj1613c | putative pyridoxamine 5'-phosphate oxidase                    |
| Cj1627c     | Cj1627c | hypothetical protein                                          |
| Cj1637c     | Cj1637c | putative periplasmic protein                                  |
| Cj1639      | Cj1639  | nifU protein homolog                                          |
| Cj1640      | Cj1640  | hypothetical protein                                          |
| Cj1642      | Cj1642  | hypothetical protein                                          |
| Cj1649      | Cj1649  | putative lipoprotein                                          |
| Cj1650      | Cj1650  | hypothetical protein                                          |
| Cj1656c     | Cj1656c | hypothetical protein                                          |
| Cj1667c     | Cj1667c | repA protein homolog                                          |
| Cj1671c     | Cj1671c | hypothetical protein                                          |
| Cj1674      | Cj1674  | hypothetical protein                                          |
| Cj1679      | Cj1679  | hypothetical protein                                          |
| Cj1710c     | Cj1710c | putative metallo-beta-lactamase family protein                |
| Cj1712      | Cj1712  | hypothetical protein                                          |
| Cj1713      | Cj1713  | putative radical SAM domain protein                           |
| Cj1714      | Cj1714  | small hydrophobic protein                                     |
| Cj1715      | Cj1715  | putative acetyltransferase                                    |
| Cj1720      | Cj1720  | hypothetical protein                                          |
| Cj1724c     | Cj1724c | putative GTP cyclohydrolase I                                 |
